# Supplementary material for: Direct Tensile Measurement for Cemented Paste Backfill
Source: MDPI journal article supplement (doi:10.3390/min13091218), 2023-09-16
Supplement: s1 [file s1]

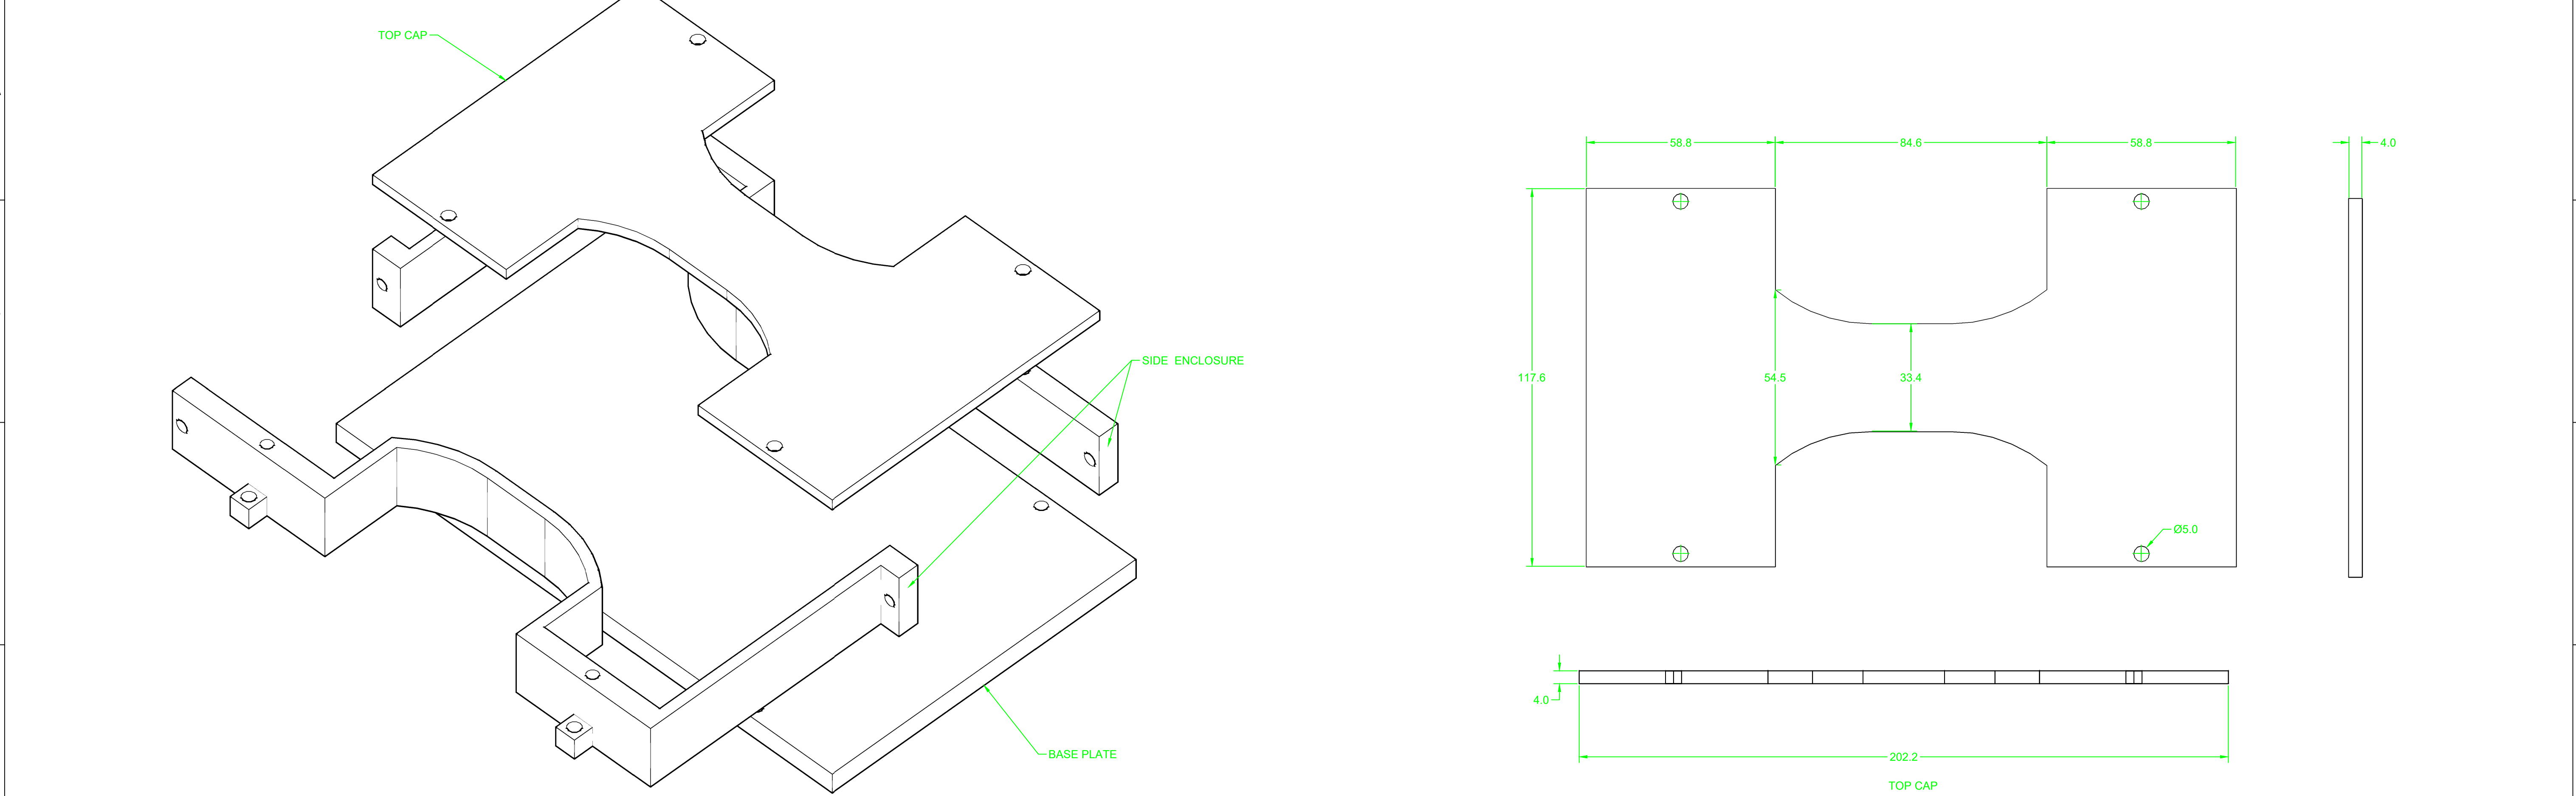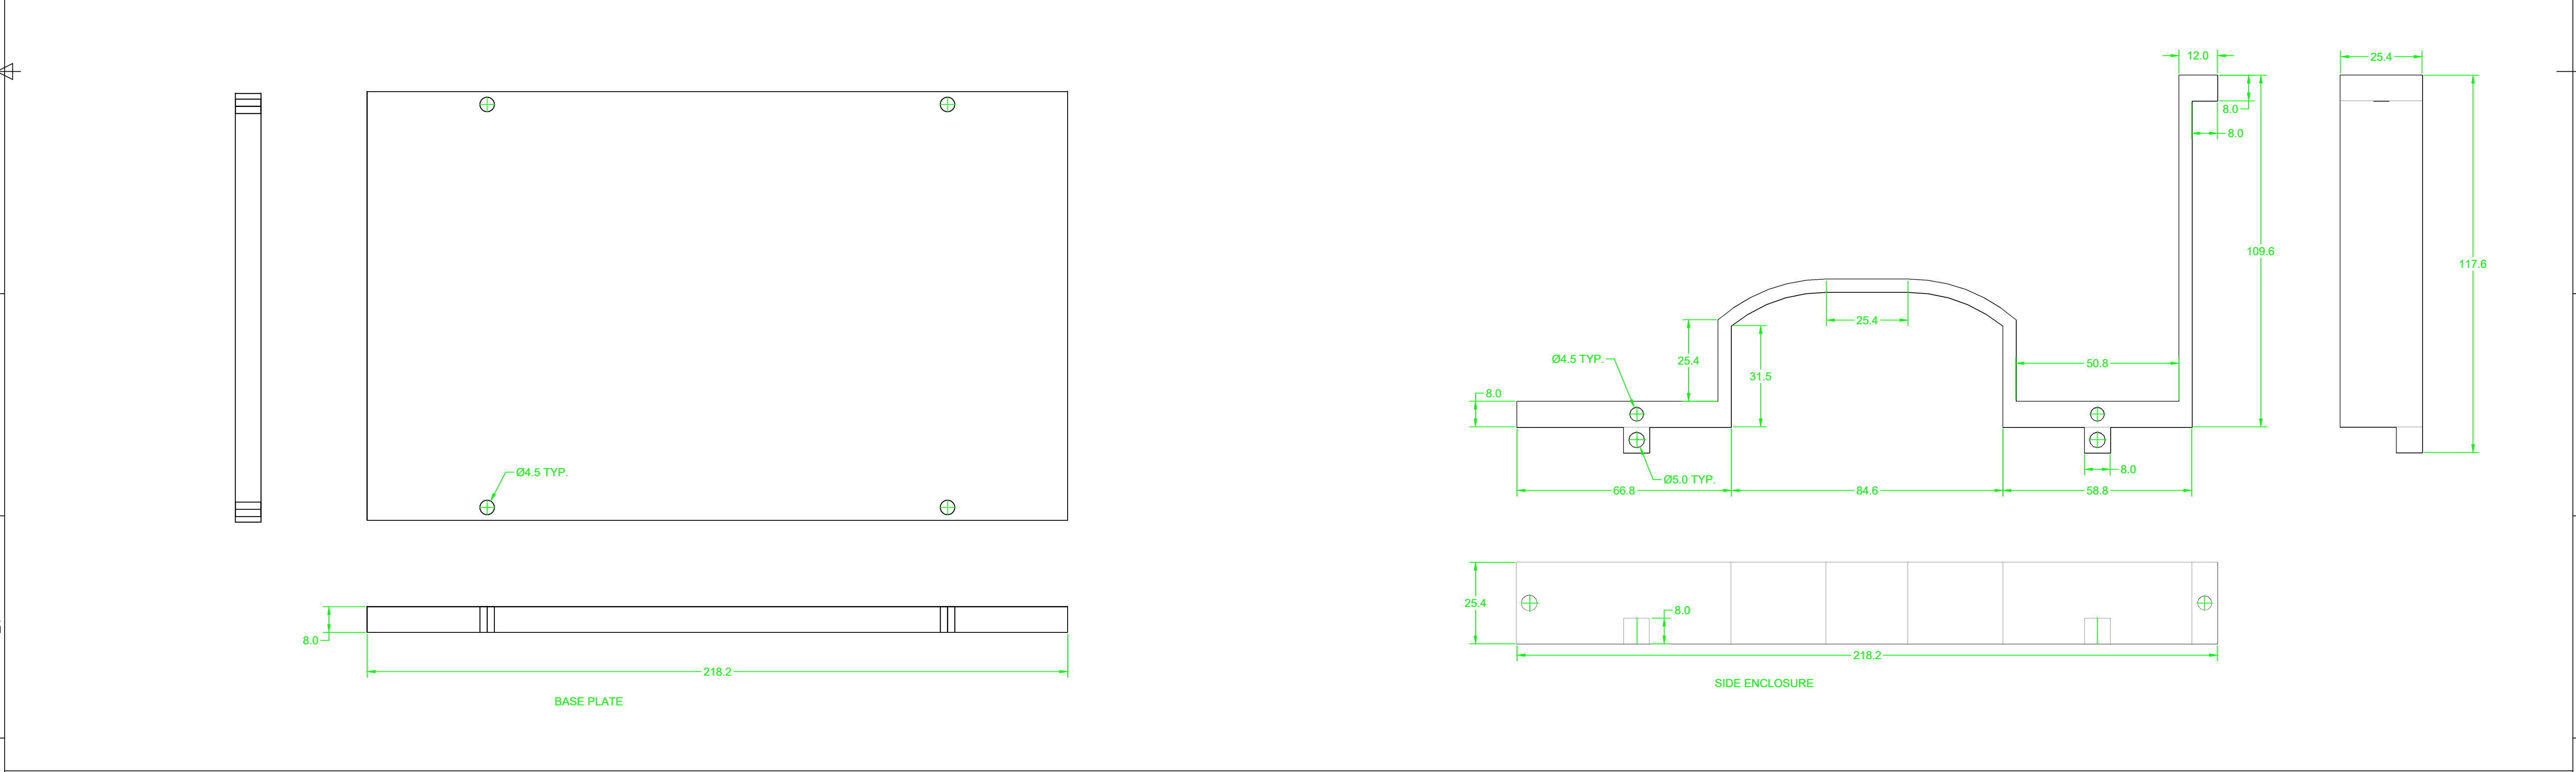

# RECTANGULAR DOGBONE MOLD

Andrew Pan\* and Murray Grabinsky  
Department of Civil and Mineral Engineering, University of Toronto, Toronto,  
ON M5S 1A4, Canada  
\*Correspondence: andrew.pan@mail.utoronto.ca

- NOTES:
1. ALL DIMENSIONS ARE NOTES IN MILLIMETER UNLESS NOTED OTHERWISE
  2. THE RECTANGULAR DOGBONE CASTABLE DOGBONE (RCD) MOLD IS COMPOSED OF THE BASE CAP , SIDE ENCLOSURES, AND TOP CAP
  3. THE MOLD IS ASSEMBLED VIA 10 SCREWS, 4 SCREWS ARE USED TO SECURE THE SIDE ENCLOSURE TO THE BASE PLATE; 2 SCREWS ARE ARE USED TO HELD THE SIDE ENCLOSURES TOGETHER, AND 4 SCREWS ARE USED TO FASTEN THE CAP
  4. THE DRAWING IS PROVIDED FOR ACADEMIC PURPOSES ONLY. THE AUTHOR DOES NOT ACCEPT ANY LIABILITY OR RESPONSIBILITY FOR MISUSE, MISINTERPRETATION, OR INACCURACIES ASSOCIATED WITH THESE DRAWINGS. USERS SHOULD ENSURE THEY UNDERSTAND AND USE THE DRAWINGS APPROPRIATELY WITHIN AN ACADEMIC CONTEXT.
- Copyright: © 2023 by the authors. Creative Commons Attribution (CC BY) license (<https://creativecommons.org/licenses/by/4.0/>).
